# Supplementary material
Source: PubMed Central journal article supplement (PMC9360225)
Supplement: ajcr0012-3014-f9.pdf [file ajcr0012-3014-f9.pdf]

## Arp2/3 and BRAF<sup>V600E</sup> axis in thyroid cancer

**Supplementary Table 1.** List of cell lines and their BRAF and N-RAS status used in this study

|   | Origin         | Cell line               | BRAF status | NRAS status | Reference          |
|---|----------------|-------------------------|-------------|-------------|--------------------|
| 1 | Thyroid Cancer | K1                      | V600E       | WT          | Xing et al. [1]    |
| 2 |                | KAT18                   | WT          | WT          |                    |
| 3 |                | NPA                     | V600E       | WT          |                    |
| 4 |                | TPC1                    | WT          | WT          |                    |
| 5 |                | SW1736                  | V600E       | WT          | Xing et al. [1, 2] |
| 6 |                | MDA-T32                 | V600E       | WT          | Henderson [3]      |
| 7 | Thyroid Cancer | BCPAP                   | V600E       | WT          | Schweppe [4]       |
| 8 | Normal Thyroid | Nthy-Ori-3-1            | WT          | WT          | Lemoine [5]        |
| 9 | Fibroblasts    | MEF-BRAF <sup>-/-</sup> | Knockout    | WT          | Baccarini [6]      |

### References

- [1] Xing J, Liu R, Xing M and Trink B. The BRAFT1799A mutation confers sensitivity of thyroid cancer cells to the BRAFV600E inhibitor PLX4032 (RG7204). *Biochem Biophys Res Commun* 2011; 404: 958-962.
- [2] Gunda V, Bucur O, Varnau J, Vanden Borre P, Bernasconi MJ, Khosravi-Far R and Parangi S. Blocks to thyroid cancer cell apoptosis can be overcome by inhibition of the MAPK and PI3K/AKT pathways. *Cell Death Dis* 2014; 5: e1104.
- [3] Henderson YC, Ahn SH, Ryu J, Chen Y, Williams MD, El-Naggar AK, Gagea M, Schweppe RE, Haugen BR, Lai SY and Clayman GL. Development and characterization of six new human papillary thyroid carcinoma cell lines. *J Clin Endocrinol Metab* 2015; 100: E243-252.
- [4] Schweppe RE, Klopper JP, Korch C, Pugazhenthii U, Benezra M, Knauf JA, Fagin JA, Marlow LA, Copland JA, Smallridge RC and Haugen BR. Deoxyribonucleic acid profiling analysis of 40 human thyroid cancer cell lines reveals cross-contamination resulting in cell line redundancy and misidentification. *J Clin Endocrinol Metab* 2008; 93: 4331-4341.
- [5] Lemoine NR, Mayall ES, Jones T, Sheer D, McDermid S, Kendall-Taylor P and Wynford-Thomas D. Characterisation of human thyroid epithelial cells immortalised in vitro by simian virus 40 DNA transfection. *Br J Cancer* 1989; 60: 897-903.
- [6] Galabova-Kovacs G, Matzen D, Piazzolla D, Meissl K, Plyushch T, Chen AP, Silva A and Baccarini M. Essential role of B-Raf in ERK activation during extraembryonic development. *Proc Natl Acad Sci U S A* 2006; 103: 1325-1330.
